# Supplementary material for: Housing conditions of urban households with Aboriginal children in NSW Australia: tenure type matters
Source: BMC Public Health. 2017 Aug 1;18:70. doi: 10.1186/s12889-017-4607-y (PMC5540447; doi:10.1186/s12889-017-4607-y)
Supplement: Supplementary file 1 — SEARCH Housing questions for Tenure Type Matters. (PDF 457 kb) [file 12889_2017_4607_MOESM1_ESM.pdf]

**S1. SEARCH Housing questions for Tenure Type Matters**

AMS (ACCHS)

Family Number

Study ID Number of Carer

Interviewer

Date of Interview

  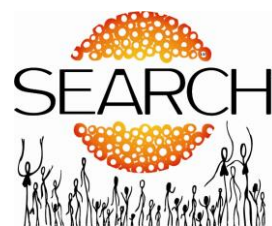

# SEARCH

## Study of Environment on Aboriginal Resilience and Child Health

### I. Parent/Carer Survey

1a. Age  Years

---

1b. Sex ☐ Male ☐ Female

---

1c. Are you of Aboriginal or Torres Strait Islander descent?

- |                                                      |                                                                     |
|------------------------------------------------------|---------------------------------------------------------------------|
| <input type="checkbox"/> Yes, Aboriginal             | <input type="checkbox"/> Yes, Aboriginal and Torres Strait Islander |
| <input type="checkbox"/> Yes, Torres Strait Islander | <input type="checkbox"/> No                                         |

---

2b. What qualifications do you have? (cross all that apply)

- |                                                       |                                                              |
|-------------------------------------------------------|--------------------------------------------------------------|
| <input type="checkbox"/> None                         | <input type="checkbox"/> Trade/apprenticeship                |
| <input type="checkbox"/> Certificate from college     | <input type="checkbox"/> Diploma (beyond Year 12)            |
| <input type="checkbox"/> Bachelor Degree              | <input type="checkbox"/> Post Graduate diploma/higher degree |
| <input type="checkbox"/> Other (please specify) _____ |                                                              |
| <input type="checkbox"/> Refused                      | <input type="checkbox"/> Don't know                          |

**a. How would you describe your current employment status?**

- ☐ Employed full-time (include self employed)
- ☐ Employed part-time (include self employed)
- ☐ Unemployed
- ☐ Student and working ☐ Student and not working
- ☐ Home duties ☐ Retired
- ☐ Unable to work due to health problems
- ☐ Other (please specify) \_\_\_\_\_
- ☐ Refused ☐ Don't know

**3c. Which of these groupings would best describe your HOUSEHOLD'S income for the past 2 WEEKS from all sources (e.g. wages, CDEP, pensions and study allowances etc)?**

*Please use prompt card.*

- ☐ \$1- \$199 ☐ \$200 - \$399 ☐ \$400 - \$599 ☐ \$600 - \$799
- ☐ \$800 - \$1999 ☐ \$2000 and over ☐ None
- ☐ Other (please specify) \_\_\_\_\_
- ☐ Refused ☐ Don't know

**13. Have any of these issues affected you and your family in the past 12 months?**

- | No                       | Yes                      | Refused                  | Don't know               |                                                                                 |
|--------------------------|--------------------------|--------------------------|--------------------------|---------------------------------------------------------------------------------|
| <input type="checkbox"/> | <input type="checkbox"/> | <input type="checkbox"/> | <input type="checkbox"/> | <b>k.</b> You have felt too crowded in where you lived                          |
| <input type="checkbox"/> | <input type="checkbox"/> | <input type="checkbox"/> | <input type="checkbox"/> | <b>p.</b> You were forced to move out of a place you were living for any reason |

**15. What best describes your current housing?**

- ☐ House ☐ Flat, unit, apartment
- ☐ Other (please specify) \_\_\_\_\_
- ☐ Refused ☐ Don't know

**16. How long have you lived there?**

Years &  Months ☐ Refused ☐ Don't know

---

**17. How many people usually sleep in your current home?**

People ☐ Refused ☐ Don't know

---

**18. How many bedrooms are in your home?**

Bedrooms ☐ Refused ☐ Don't know

**19. Is your current home:**

No Yes Refused Don't know

- |                          |                          |                          |                          |                                                                                                                             |
|--------------------------|--------------------------|--------------------------|--------------------------|-----------------------------------------------------------------------------------------------------------------------------|
| <input type="checkbox"/> | <input type="checkbox"/> | <input type="checkbox"/> | <input type="checkbox"/> | <b>a.</b> Owned by you or any usual member of this household?                                                               |
| <input type="checkbox"/> | <input type="checkbox"/> | <input type="checkbox"/> | <input type="checkbox"/> | <b>b.</b> Being paid off by you or any usual member of this household?                                                      |
| <input type="checkbox"/> | <input type="checkbox"/> | <input type="checkbox"/> | <input type="checkbox"/> | <b>c.</b> Rented by you or any usual member of this household?                                                              |
| <input type="checkbox"/> | <input type="checkbox"/> | <input type="checkbox"/> | <input type="checkbox"/> | <b>d.</b> Owned by the Department of Housing?                                                                               |
| <input type="checkbox"/> | <input type="checkbox"/> | <input type="checkbox"/> | <input type="checkbox"/> | <b>e.</b> Owned by Aboriginal Housing Office?                                                                               |
| <input type="checkbox"/> | <input type="checkbox"/> | <input type="checkbox"/> | <input type="checkbox"/> | <b>f.</b> Owned by Community Housing (Land Council, other Aboriginal housing provider or other community housing provider)? |
| <input type="checkbox"/> | <input type="checkbox"/> | <input type="checkbox"/> | <input type="checkbox"/> | <b>g.</b> Other (please specify)<br>_____                                                                                   |
- 

**20. Does the home that you live in have any of the following problems?**

No Yes Refused Don't know

- |                          |                          |                          |                          |                                   |
|--------------------------|--------------------------|--------------------------|--------------------------|-----------------------------------|
| <input type="checkbox"/> | <input type="checkbox"/> | <input type="checkbox"/> | <input type="checkbox"/> | <b>a.</b> Too big                 |
| <input type="checkbox"/> | <input type="checkbox"/> | <input type="checkbox"/> | <input type="checkbox"/> | <b>b.</b> Too small               |
| <input type="checkbox"/> | <input type="checkbox"/> | <input type="checkbox"/> | <input type="checkbox"/> | <b>c.</b> Needs to be more secure |
-

| No                       | Yes                      | Refused                  | Don't know               |                                                            |
|--------------------------|--------------------------|--------------------------|--------------------------|------------------------------------------------------------|
| <input type="checkbox"/> | <input type="checkbox"/> | <input type="checkbox"/> | <input type="checkbox"/> | d. Rates too expensive                                     |
| <input type="checkbox"/> | <input type="checkbox"/> | <input type="checkbox"/> | <input type="checkbox"/> | e. Mortgage too expensive                                  |
| <input type="checkbox"/> | <input type="checkbox"/> | <input type="checkbox"/> | <input type="checkbox"/> | f. Rent too expensive                                      |
| <input type="checkbox"/> | <input type="checkbox"/> | <input type="checkbox"/> | <input type="checkbox"/> | g. Rising damp                                             |
| <input type="checkbox"/> | <input type="checkbox"/> | <input type="checkbox"/> | <input type="checkbox"/> | h. Damp or mildew on any of the walls, ceilings or windows |
| <input type="checkbox"/> | <input type="checkbox"/> | <input type="checkbox"/> | <input type="checkbox"/> | i. Major cracks in walls/floors                            |
| <input type="checkbox"/> | <input type="checkbox"/> | <input type="checkbox"/> | <input type="checkbox"/> | j. Sinking/moving foundations                              |
| <input type="checkbox"/> | <input type="checkbox"/> | <input type="checkbox"/> | <input type="checkbox"/> | k. Sagging floors                                          |
| <input type="checkbox"/> | <input type="checkbox"/> | <input type="checkbox"/> | <input type="checkbox"/> | l. Walls or windows that are not straight                  |
| <input type="checkbox"/> | <input type="checkbox"/> | <input type="checkbox"/> | <input type="checkbox"/> | m. Wood rot/termite damage                                 |
| <input type="checkbox"/> | <input type="checkbox"/> | <input type="checkbox"/> | <input type="checkbox"/> | n. Major electrical problems                               |
| <input type="checkbox"/> | <input type="checkbox"/> | <input type="checkbox"/> | <input type="checkbox"/> | o. Major plumbing problems                                 |
| <input type="checkbox"/> | <input type="checkbox"/> | <input type="checkbox"/> | <input type="checkbox"/> | p. Cockroaches, mice or other vermin                       |
|                          |                          |                          |                          | r. Other (please specify) _____                            |

21. Are you able to make your home warm enough in winter?

☐ No
 ☐ Yes
 ☐ Refused
 ☐ Don't know

22. Are you able to make your home cool enough in summer?

☐ No
 ☐ Yes
 ☐ Refused
 ☐ Don't know

23. Is there a functioning smoke alarm installed in your home?

☐ No
 ☐ Yes
 ☐ Refused
 ☐ Don't know

[NB Q4 below is taken from the Child Health Survey completed for participating SEARCH children]

Q 4. Since \_\_\_\_\_ was born how many different houses has he/she lived in?

☐ ☐ Number
 ☐ Refused
 ☐ Don't know
