# Supplementary material for: Housing conditions of urban households with Aboriginal children in NSW Australia: tenure type matters
Source: BMC Public Health. 2017 Aug 1;18:70. doi: 10.1186/s12889-017-4607-y (PMC5540447; doi:10.1186/s12889-017-4607-y)
Supplement: Supplementary file 2 — Analysis Variables for Tenure Type Matters. (PDF 278 kb) [file 12889_2017_4607_MOESM2_ESM.pdf]

## Additional File 2. Analysis Variables for Tenure Type Matters

| Construct                   | Variable Name                                | Survey Question                                                                                                                                                       | Response Options                                                                                                                                                                                                                       | Analysis Categories/ Range                                                                                                                                                                   |
|-----------------------------|----------------------------------------------|-----------------------------------------------------------------------------------------------------------------------------------------------------------------------|----------------------------------------------------------------------------------------------------------------------------------------------------------------------------------------------------------------------------------------|----------------------------------------------------------------------------------------------------------------------------------------------------------------------------------------------|
| <b>Carer Demographics</b>   | Age                                          | 1a. Age __ years                                                                                                                                                      | Age in years                                                                                                                                                                                                                           | [numeric value, discrete number]                                                                                                                                                             |
|                             | Gender                                       | 1b. Sex                                                                                                                                                               | Male;<br>Female                                                                                                                                                                                                                        | 0 - Male #<br>1- Female                                                                                                                                                                      |
|                             | Aboriginal and Torres Strait Islander Status | 1c. Are you of Aboriginal or Torres Strait Islander descent?                                                                                                          | Yes, Aboriginal;<br>Yes, Torres Strait Islander;<br>Yes, Aboriginal & Torres Strait Islander;<br>No                                                                                                                                    | 0 - non-Aboriginal# (no)<br>1 - Aboriginal (Yes to any)                                                                                                                                      |
|                             | ACCHS                                        | [site noted by research officer]                                                                                                                                      | A; B; C; D                                                                                                                                                                                                                             | 0 - A#, 1 - B, 2 - C, 3 - D                                                                                                                                                                  |
| <b>Socioeconomic Status</b> | Qualifications                               | 2b. What qualifications do you have?                                                                                                                                  | None;<br>Trade/apprenticeship;<br>Certificate from college;<br>Diploma (beyond Year 12);<br>Bachelor Degree;<br>Post Graduate diploma/higher degree;<br>Other                                                                          | 0 - Bachelor or postgraduate degree#<br>1 - Trade, certificate, diploma<br>2 - None                                                                                                          |
|                             | Employment Status                            | 3a. How would you describe your current employment status?                                                                                                            | Employed full-time (incl self-employed);<br>Employed part-time (incl self-employed);<br>Unemployed;<br>Student and working;<br>Student and not working;<br>Home duties;<br>Retired;<br>Unable to work due to health problems;<br>Other | 0 - Employed# (full time or part time)<br>1 - Studying (student working or not working)<br>2 - Home duties<br>3 - Not working (unemployed, retired or unable to work due to health problems) |
|                             | Fortnightly income                           | 3c. Which of these groupings would best describe your HOUSEHOLD'S income for the past 2 WEEKS from all sources (e.g. wages, CDEP, pensions and study allowances etc)? | \$1-199;<br>\$200-399;<br>\$400-599;<br>\$600-799;<br>\$800-1999;<br>\$2000 and over;<br>None; Other                                                                                                                                   | 0 - \$2000+ #<br>1 - \$800-1000<br>2 - \$0-799                                                                                                                                               |

| Construct                 | Variable Name                                 | Survey Question                                                                                                                                                                | Response Options                                                                                                                                                                                                                                                                                                                                                                                             | Analysis Categories/ Range                                                   |
|---------------------------|-----------------------------------------------|--------------------------------------------------------------------------------------------------------------------------------------------------------------------------------|--------------------------------------------------------------------------------------------------------------------------------------------------------------------------------------------------------------------------------------------------------------------------------------------------------------------------------------------------------------------------------------------------------------|------------------------------------------------------------------------------|
| <b>Tenure Type</b>        | Tenure Type                                   | 19. Is your current home:                                                                                                                                                      | a. Owned by you or any usual member of this household;<br>b. being paid off by you or any usual member of this household;<br>c. rented by you or any usual member of this household;<br>d. owned by the department of housing;<br>e. Owned by Aboriginal Housing Office;<br>f. Owned by Community Housing (Land Council, other Aboriginal housing provider or other community housing provider);<br>g. Other | 0 - Owned (a or b)#<br>1 - Private rent (c)#<br>2 - Social housing (d, e, f) |
| <b>Dwelling Structure</b> | Dwelling Structure                            | 15. What best describes your current housing?                                                                                                                                  | House;<br>Flat, unit, apartment;<br>Other                                                                                                                                                                                                                                                                                                                                                                    | 0 - House#<br>1 - Apartment<br>(NB 'House' includes townhouse)               |
| <b>Mobility</b>           | Duration of residence in current home         | 16. How long have you lived there?                                                                                                                                             | __ Years and __ Months                                                                                                                                                                                                                                                                                                                                                                                       | [numeric value – discrete number of months, expressed as years]              |
|                           | Number of houses child lived in since birth ¥ | <i>Q4. Child Health Survey.<br/>Since _____ was born, how many different houses has he/she lived in?</i>                                                                       | __ Number                                                                                                                                                                                                                                                                                                                                                                                                    | [numeric value – discrete]<br><br>0 - 1-3 homes#<br>1 - 4+ homes             |
|                           | Forced to move in past 12 months              | 13. Have any of these issues affected you and your family in the past 12 months?<br><br>You were forced to move out of a place you were living for any reason.                 | No;<br>Yes                                                                                                                                                                                                                                                                                                                                                                                                   | 0 - No#<br>1 - Yes                                                           |
| <b>Affordability</b>      | Affordability problems                        | Derived variable from<br>20 Does the home that you live in have any of the following problems:<br>d. Rates too expensive<br>e. Mortgage too expensive<br>f. Rent too expensive | No (if no to d, e & f);<br>Yes (if yes to d, e or f)                                                                                                                                                                                                                                                                                                                                                         | 0 - No#<br>1 - Yes                                                           |

| Construct           | Variable Name                 | Survey Question                                                                                                                           | Response Options       | Analysis Categories/ Range                                                                                                                                                              |
|---------------------|-------------------------------|-------------------------------------------------------------------------------------------------------------------------------------------|------------------------|-----------------------------------------------------------------------------------------------------------------------------------------------------------------------------------------|
| Household Occupancy | Number of usual residents     | 17. How many people usually sleep in your current home?                                                                                   | __ People              | [numeric value – discrete]                                                                                                                                                              |
|                     | Number of Bedrooms            | 18. How many bedrooms are in your home?                                                                                                   | __ Bedrooms            | [numeric value – discrete]                                                                                                                                                              |
|                     | Persons Per Bedroom (PPB)     | Derived variable from 17 & 18:<br>number of usual residents divided by<br>number of bedrooms                                              | Ratio: people/ bedroom | [continuous ratio]<br><br>0 - 2 or fewer PPB#<br>1 - >2 PPB<br><i>(2 or more PPB considered crowded, as<br/>per first condition of Canadian<br/>National Occupancy Standard (CNOS))</i> |
|                     | Subjective Crowding           | 13. Have any of these issues affected<br>you and your family in the past 12<br>months?<br><br>You have felt crowded in where you<br>lived | No; Yes                | 0 - No#<br>1 - Yes                                                                                                                                                                      |
|                     | Home too big                  | 20. Does the home that you live in<br>have any of the following problems:<br>a. Too big                                                   | No; Yes                | 0 - No#<br>1 - Yes                                                                                                                                                                      |
|                     | Home too small                | 20 b. Too small                                                                                                                           | No; Yes                |                                                                                                                                                                                         |
| Dwelling Quality    | Major cracks in walls/floors  | 20 i. Major cracks in walls or floors                                                                                                     | No; Yes                | 0 - No#<br>1 - Yes                                                                                                                                                                      |
|                     | Sinking/moving foundations    | 20 j. Sinking/moving foundations                                                                                                          | No; Yes                | 0 - No#<br>1 - Yes                                                                                                                                                                      |
|                     | Sagging floors                | 20 k. Sagging floors                                                                                                                      | No; Yes                | 0 - No#<br>1 - Yes                                                                                                                                                                      |
|                     | Walls or windows not straight | 20 l. Walls or windows not straight                                                                                                       | No; Yes                | 0 - No#<br>1 - Yes                                                                                                                                                                      |
|                     | Wood rot/termite damage       | 20 m. Wood rot/termite damage                                                                                                             | No; Yes                | 0 - No#<br>1 - Yes                                                                                                                                                                      |

| Construct        | Variable Name                                              | Survey Question                                                                    | Response Options                                                | Analysis Categories/ Range                                                   |
|------------------|------------------------------------------------------------|------------------------------------------------------------------------------------|-----------------------------------------------------------------|------------------------------------------------------------------------------|
| Dwelling Quality | <b>Structural problems (*Domain)</b>                       | Derived variable from Q 20 i - m                                                   | No (if no to 20 i-m)<br>Yes (if yes to one or more of 20 i-m)   | 0 - No#<br>1 - Yes                                                           |
|                  | Rising damp                                                | 20 g. Rising damp                                                                  |                                                                 | 0 - No#<br>1 - Yes                                                           |
|                  | Damp/mildew on walls, ceilings, windows                    | 20 h. Damp or mildew on any of the walls, ceilings or windows                      |                                                                 | 0 - No#<br>1 - Yes                                                           |
|                  | <b>Damp or mildew (*Domain)</b>                            | Derived variable from Q 20 g, h                                                    | No (if no to 20 g, h)<br>Yes (if yes to one or both of 20 g, h) | 0 - No#<br>1 - Yes                                                           |
|                  | <b>Major electrical problems (*Domain)</b>                 | 20 n. Major electrical problems                                                    | No; Yes                                                         | 0 - No#<br>1 - Yes                                                           |
|                  | <b>Major plumbing problems (*Domain)</b>                   | 20 o. Major plumbing problems                                                      | No; Yes                                                         | 0 - No#<br>1 - Yes                                                           |
|                  | <b>Vermin (*Domain)</b>                                    | 20 p. Cockroaches, mice or other                                                   | No; Yes                                                         | 0 - No#<br>1 - Yes                                                           |
|                  | <b>Needs to me more secure (*Domain)</b>                   | 20 c. Needs to me more secure                                                      | No; Yes                                                         | 0 - No#<br>1 - Yes                                                           |
|                  | Unable to make home warm enough in winter                  | 21. Are you able to make your home warm enough in winter?                          | No; Yes                                                         | 0 - No<br>1 – Yes#                                                           |
|                  | Unable to make home cool enough in summer                  | 22. Are you able to make your home cool enough in summer?                          | No; Yes                                                         | 0 - No<br>1 – Yes#                                                           |
|                  | <b>Temperature control (*Domain)</b>                       | Derived variable from 21 & 22                                                      | No to either 21 or 22 = yes to temperature control problem      | 0 - No#<br>1 - Yes                                                           |
|                  | <b>No functioning smoke alarm (*Domain)</b>                | 23. Is there a functioning smoke alarm installed in your home?                     | No; Yes                                                         | 0 - No<br>1 – Yes#                                                           |
|                  | <b>Number of Physical Dwelling Problems (of 8 Domains)</b> | Derived variable – tally of number of physical dwelling problems from each *Domain | Score 1 for every physical dwelling problem *Domain             | [numeric value – discrete, score 0-8]0<br>- 0-2 problems#<br>1 - 3+ problems |

# referent category      \*8 Physical Dwelling Problem Domains (structural, damp or mildew, electrical, plumbing, no smoke alarm, security, vermin & temperature control) ¥ note that models including number of houses lived in since birth were also adjusted for child age in months, a variable derived from the child health survey child date of birth question and date of survey.
